# Supplementary material
Source: PubMed Central journal article supplement (PMC6233428)
Supplement: 13197_2018_3448_MOESM1_ESM.pdf [file 13197_2018_3448_MOESM1_ESM.pdf]

## Supplementary data

### Effects on the Quality and Health-Enhancing Properties of Wheat Bread of the Addition of Industrial Onion Waste Powder

Journal of Food Science and Technology

**Table 1S** Sensory evaluation of bread with different levels of IOWP

| Attribute              | Substitution levels, % |                       |                       |                      |                      |                      |
|------------------------|------------------------|-----------------------|-----------------------|----------------------|----------------------|----------------------|
|                        | 0                      | 1                     | 2                     | 3                    | 4                    | 5                    |
| Shape                  | 7.4±1.2 <sup>a</sup>   | 7.2±0.4 <sup>ab</sup> | 6.8±0.5 <sup>bc</sup> | 6.4±0.5 <sup>c</sup> | 4.6±0.6 <sup>d</sup> | 2.0±0.9 <sup>e</sup> |
| Crust color            | 7.8±0.4 <sup>a</sup>   | 7.2±0.4 <sup>b</sup>  | 7.0±0.7 <sup>b</sup>  | 6.6±0.8 <sup>b</sup> | 5.6±0.6 <sup>c</sup> | 4.6±1.6 <sup>d</sup> |
| Crumb color            | 7.6±1.4 <sup>a</sup>   | 7.4±0.5 <sup>a</sup>  | 6.4±0.5 <sup>b</sup>  | 5.8±0.5 <sup>c</sup> | 3.6±0.6 <sup>d</sup> | 2.8±0.8 <sup>e</sup> |
| Aroma                  | 8.2±0.8 <sup>a</sup>   | 7.2±0.4 <sup>b</sup>  | 6.2±1.4 <sup>c</sup>  | 5.8±0.4 <sup>c</sup> | 4.0±0.8 <sup>d</sup> | 3.0±0.6 <sup>e</sup> |
| Uniformity of porosity | 8.2±1.2 <sup>a</sup>   | 8.0±0.4 <sup>a</sup>  | 7.0±0.8 <sup>b</sup>  | 7.0±0.8 <sup>b</sup> | 6.0±0.9 <sup>c</sup> | 4.8±1.0 <sup>d</sup> |
| Chewability            | 8.4±0.5 <sup>a</sup>   | 7.8±0.5 <sup>b</sup>  | 7.6±0.5 <sup>bc</sup> | 7.0±1.1 <sup>c</sup> | 5.0±1.1 <sup>d</sup> | 4.8±1.0 <sup>d</sup> |
| Taste                  | 8.4±0.5 <sup>a</sup>   | 8.0±0.6 <sup>a</sup>  | 7.4±0.6 <sup>b</sup>  | 7.2±0.5 <sup>b</sup> | 5.0±0.4 <sup>c</sup> | 4.8±0.8 <sup>c</sup> |
| Aftertaste             | 0.0±0.0 <sup>a</sup>   | 2.2±2.7 <sup>b</sup>  | 2.4±1.8 <sup>b</sup>  | 2.8±1.3 <sup>b</sup> | 4.0±0.6 <sup>c</sup> | 5.0±0.9 <sup>c</sup> |
| Overall acceptability  | 7.8±0.4 <sup>a</sup>   | 7.4±1.1 <sup>ab</sup> | 7.2±0.7 <sup>b</sup>  | 7.0±0.6 <sup>b</sup> | 4.8±0.4 <sup>c</sup> | 4.0±0.5 <sup>d</sup> |

The data are means ± standard deviation of three independent measurements. Values within rows followed by different letters (a to e) differ significantly from each other (p < 0.05)

**Table 2S** Dietary fiber composition of IOWP (according to Prokopov et al. 2018) and bread with different levels of additive

| Samples | SDF,<br>g/100g dw      | IDF,<br>g/100g dw       | TDF,<br>g/100g dw       |
|---------|------------------------|-------------------------|-------------------------|
| IOWP    | 9.21±0.08 <sup>a</sup> | 60.52±0.13 <sup>a</sup> | 69.73±0.21 <sup>a</sup> |
| Control | 0.41±0.01 <sup>b</sup> | 1.38±0.10 <sup>b</sup>  | 1.79±0.10 <sup>b</sup>  |
| OW1     | 0.45±0.02 <sup>b</sup> | 1.53±0.10 <sup>b</sup>  | 1.98±0.10 <sup>b</sup>  |
| OW2     | 0.68±0.01 <sup>c</sup> | 2.57±0.20 <sup>c</sup>  | 3.25±0.20 <sup>c</sup>  |
| OW3     | 0.87±0.03 <sup>d</sup> | 3.89±0.10 <sup>d</sup>  | 4.76±0.10 <sup>d</sup>  |
| OW4     | 1.11±0.05 <sup>e</sup> | 4.92±0.30 <sup>e</sup>  | 6.03±0.30 <sup>e</sup>  |
| OW5     | 1.24±0.02 <sup>f</sup> | 5.91±0.20 <sup>f</sup>  | 7.15±0.20 <sup>f</sup>  |

The data are means ± standard deviation of three independent measurements. Values within column followed by different letters (a to f) differ significantly from each other (p < 0.05)

**Table 3S** Total phenolic content (TPC), total flavonoids and antioxidant activity of IOWP (according to Prokopov et al. 2018) and bread with different levels of additive

| Samples | TPC,<br>mg GAE/g dw     | Total flavonoids,<br>mg QE/g dw | Antioxidant activity     |                          |
|---------|-------------------------|---------------------------------|--------------------------|--------------------------|
|         |                         |                                 | DPPH,<br>mM TE/g dw      | FRAP,<br>mM TE/g dw      |
| IOWP    | 41.04±1.22 <sup>a</sup> | 20.44±1.22 <sup>a</sup>         | 490.54±9.43 <sup>a</sup> | 114.05±8.04 <sup>a</sup> |
| Control | 0.49±0.05 <sup>b</sup>  | n.d.                            | 0.16±0.10 <sup>b</sup>   | 0.70±0.10 <sup>b</sup>   |
| OW1     | 0.62±0.04 <sup>c</sup>  | 0.26±0.02 <sup>b</sup>          | 1.00±0.10 <sup>c</sup>   | 2.12±0.13 <sup>c</sup>   |
| OW2     | 1.02±0.05 <sup>d</sup>  | 0.57±0.05 <sup>c</sup>          | 1.49±0.07 <sup>d</sup>   | 3.40 ±0.07 <sup>d</sup>  |
| OW3     | 1.24±0.05 <sup>e</sup>  | 0.76±0.03 <sup>d</sup>          | 2.08±0.10 <sup>e</sup>   | 4.33±0.20 <sup>e</sup>   |
| OW4     | 1.58±0.01 <sup>f</sup>  | 1.38±0.04 <sup>e</sup>          | 2.81±0.09 <sup>f</sup>   | 5.27±0.05 <sup>f</sup>   |
| OW5     | 1.64±0.02 <sup>f</sup>  | 1.68±0.02 <sup>f</sup>          | 2.66±0.11 <sup>g</sup>   | 5.41±0.10 <sup>g</sup>   |

The data are means ± standard deviation of three independent measurements. Values within column followed by different letters (a to g) differ significantly from each other (p < 0.05). Not detected – n.d.  
*TPC* total phenolic content

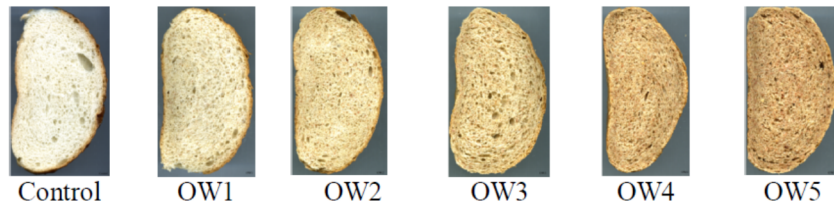

**Fig. 1S** Crumb slice images used for image analysis of breads with different levels of IOWP  
(Control: 0% IOWP; OW1: 1% IOWP; OW2: 2% IOWP; OW3: 3% IOWP; OW4: 4% IOWP;  
OW5: 5% IOWP)
